# Supplementary material for: Neutrophil-targeted, protease-activated pulmonary drug delivery blocks airway and systemic inflammation
Source: JCI journal article supplement (doi:10.1172/jci.insight.131468), 2019-10-29
Supplement: sd1 [file 1]

**NEUTROPHIL-TARGETED, PROTEASE-ACTIVATED PULMONARY  
DRUG DELIVERY BLOCKS AIRWAY AND SYSTEMIC INFLAMMATION**

Joscelyn C. Mejías, Osric A. Forrest, Camilla Margaroli, David A. Frey Rubio, Liliana Viera,  
Jindong Li, Xin Xu, Amit Gaggar, Rabindra Tirouvanziam, Krishnendu Roy

**SUPPLEMENTARY MATERIAL**

Supplementary Methods: 2 pages

Tables: 2 (S1, S2)

Figures: 5 (S1, S2, S3, S4, S5)

## Supplementary methods

*Nanoparticle fabrication.* Nanoparticles were fabricated using a single emulsion solvent evaporation method. 0.8-1 mg of Nexinhib20 (Cayman Chemicals), 0.2 mg of DiR (ThermoFisher), and 130 mg of Poly (D,L-lactide-co-glycolide) (PLGA RG502H, Sigma) was dissolved in 2 mL of ethyl acetate. The PLGA mixture was then added to 4 mL of 2.5 % w/v poly(vinyl) alcohol (PVA; Sigma) and sonicated at 65% for 10 min on ice using a Sonics Vibra-Cell VCX130 with CV18. The emulsion was then added to 50 mL of 0.3 % w/v PVA solution and magnetically stirred for 5 hours. The nanoparticles were centrifuged at 8,000 g for 10 minutes, pellet discarded, and nanoparticles in the supernatant were then washed in DI water by centrifuging at 100,000 g for 30 minutes. After the second DI rinse, the nanoparticles were resuspended in 5 mL 1% w/v trehalose solution, snap frozen in LN, lyophilized for 48h, and stored at -20 C. Nanoparticles were resuspended at 1 µg/mL in water and run on a NanoSight to determine the mean particle size from 5 replicate runs, table S1. Nanoparticles (100 mg/mL) were degraded in DMSO to measure Nexinhib20 concentration by absorbance ( $\lambda = 274$ ); Nexinhib20 was loaded at 1.48 ug/mg of PLGA formulation (21% encapsulation efficiency).

*N-in-M fabrication.* Microgels were fabricated as reported elsewhere with slight modifications to the polymer mixture. A 20 % w/v solution of equimolar amounts of di-sulphydryl elastase peptide, CGAAPVRGGGGC (Chi Scientific), and 4-arm PEG maleimide (10kDA, Laysan Bio) were dissolved in PBS. 1 µL of 10 mg/mL DyLight 488-maleimide or DyLight 650 4x PEG-maleimide and nanoparticles were added to the PEG macromer solution was added to mineral oil (1% v/v surfactant: Span 80/Tween 80, HLB = 5) and homogenized on a PRO Scientific D Series homogenizer for three minutes at 4,000 rpm in a 35-40C water bath. After several centrifuge washes microgels were then strained through a 40 µm filter and run on an Accuri to determine the % of microgels positive for PLGA nanoparticles and microgel/mL concentration and sterilized by UV. Nanoparticles incorporated were either 10 mg of the PLGA formulations or fluorescent carboxylated polystyrene beads; 60 nm Dragon Green (Bangs Laboratories) or 100 nm blue fluorospheres (ThermoFisher).

*Flow cytometry.* Cells were pre-stained with Fc block and Zombie live/dead dye (BioLegend) for 10 minutes on ice, followed by staining for 15 minutes on ice with antibodies against the following markers: CD45, Ly6G,

Ly6C, MHCII, CD11b, F4/80, CD206, CD11c, Siglec F, CD63 (BioLegend). Cells were washed with PBS-EDTA (2.5 mM), fixed with Lyse/Fix PhosFlow reagent (BD Biosciences) and acquired on a FACS LSRII (BD Biosciences) and on a Cytoflex S (Beckman Coulter). Robust acquisition of samples over time was ensured by the utilization of stringent calibration methods employing rainbow bead-based laser and channel standardization. Data analysis and fluorescence compensation were performed with FlowJo V9.9.5 and V10.4.2 (Treestar). PMNs were gated as CD45+Ly6G+CD11b+, and macrophages as CD45+F4/80+MHCII+Ly6G- (**Fig. S5**).

*Immunofluorescent staining.* Left lung lobes were fixed in 4 % paraformaldehyde at 4 °C overnight, allowed to settle in 30 % w/v sucrose for 24-48 h at 37 °C and then frozen in OCT by a dry ice isopentane mixture. 10 µm sections were sliced and stored at –80 °C until stained. Slides were washed in 1x TBS for 5 minutes, blocked for 2 h at room temperature in 5 % goat serum with 0.5 % Triton X, incubated at 4 °C overnight with the primary antibody, 1:100 dilution MPO (ThermoFisher) in 5% goat serum. Slides were then washed and stained with secondary, 1:250 dilution goat anti-rabbit Alexa Fluor 555 (ThermoFisher) with 5 µg/mL DAPI for 1 h at room temperature. Then samples were mounted using Prolong Gold. Average background of each channel from the secondary stain was used to linearly adjust the contrast equally across all images.

**Table S1. PLGA nanoparticle size**

|                | Size (nm)   | D90 (nm)    |
|----------------|-------------|-------------|
| DiR PLGA       | 177.2 ± 4.3 | 265 ± 9.5   |
| Nex20 DiR PLGA | 145.6 ± 3.3 | 196.5 ± 8.9 |

N = 5

**Table S2. Antibodies used in the study**

| <b>Antibody</b> | <b>Clone</b>      | <b>Species</b>   | <b>Company</b> |
|-----------------|-------------------|------------------|----------------|
| <b>CD45</b>     | 30-F11            | anti-mouse       | BioLegend      |
| <b>Ly6G</b>     | 1A8               | anti-mouse       | BioLegend      |
| <b>Ly6C</b>     | HK1.4             | anti-mouse       | BioLegend      |
| <b>MHCII</b>    | M5/114.15.2       | anti-mouse       | BioLegend      |
| <b>CD11b</b>    | M1/70             | anti-mouse       | BioLegend      |
| <b>F4/80</b>    | BM8               | anti-mouse       | BioLegend      |
| <b>CD206</b>    | C068C2            | anti-mouse       | BioLegend      |
| <b>SiglecF</b>  | S17007L           | anti-mouse       | BioLegend      |
| <b>CD11c</b>    | N418              | anti-mouse       | BioLegend      |
| <b>CD63</b>     | NVG-2             | anti-mouse       | BioLegend      |
| <b>NE</b>       | 887105            | anti-mouse       | R&D Systems    |
| <b>MPO</b>      | RRID: AB_11006367 | anti-mouse       | ThermoFisher   |
| <b>AF555</b>    | Polyclonal        | Goat anti-rabbit | ThermoFisher   |
| <b>CD66b</b>    | G10F5             | anti-human       | BioLegend      |

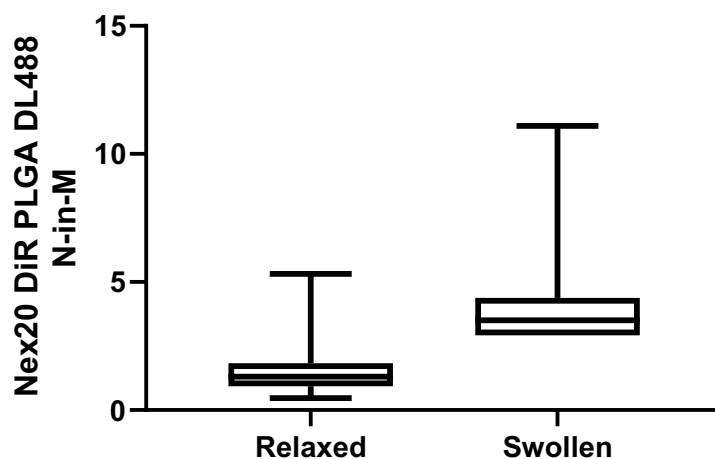

**Figure S1. N-in-M size in relaxed and swollen states.** PLGA nanoparticles were encapsulated in DyLight 488 labeled elastase-responsive microgels and size was measured by microscopy in the relaxed (oil; N = 1,047) and swollen states of the microgels (water; N = 161). Boxplot whiskers from min to max.

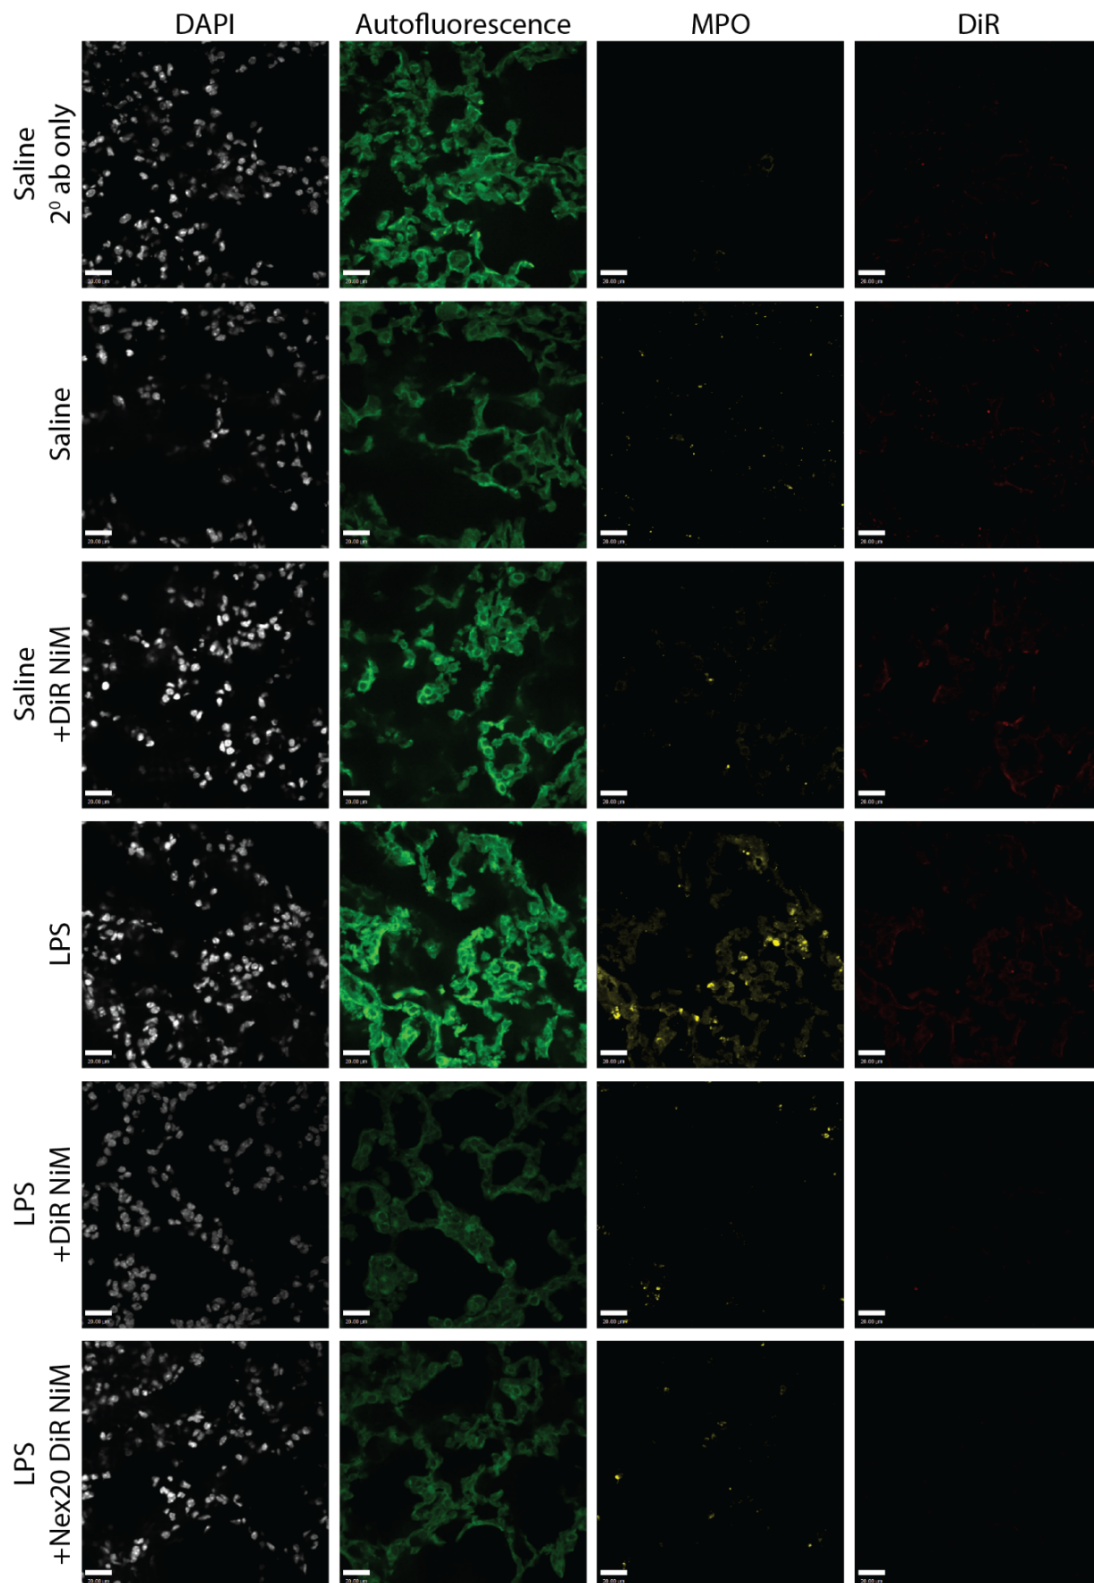

**Figure S2. Microscopic analysis of PMN-driven inflammation in the lung.** Treatment with Nex20 N-in-M show decreased presence of myeloperoxidase (MPO) presence in tissue sections relative to the LPS control, scale bar = 20 µm, linearly contrasted for clarity.

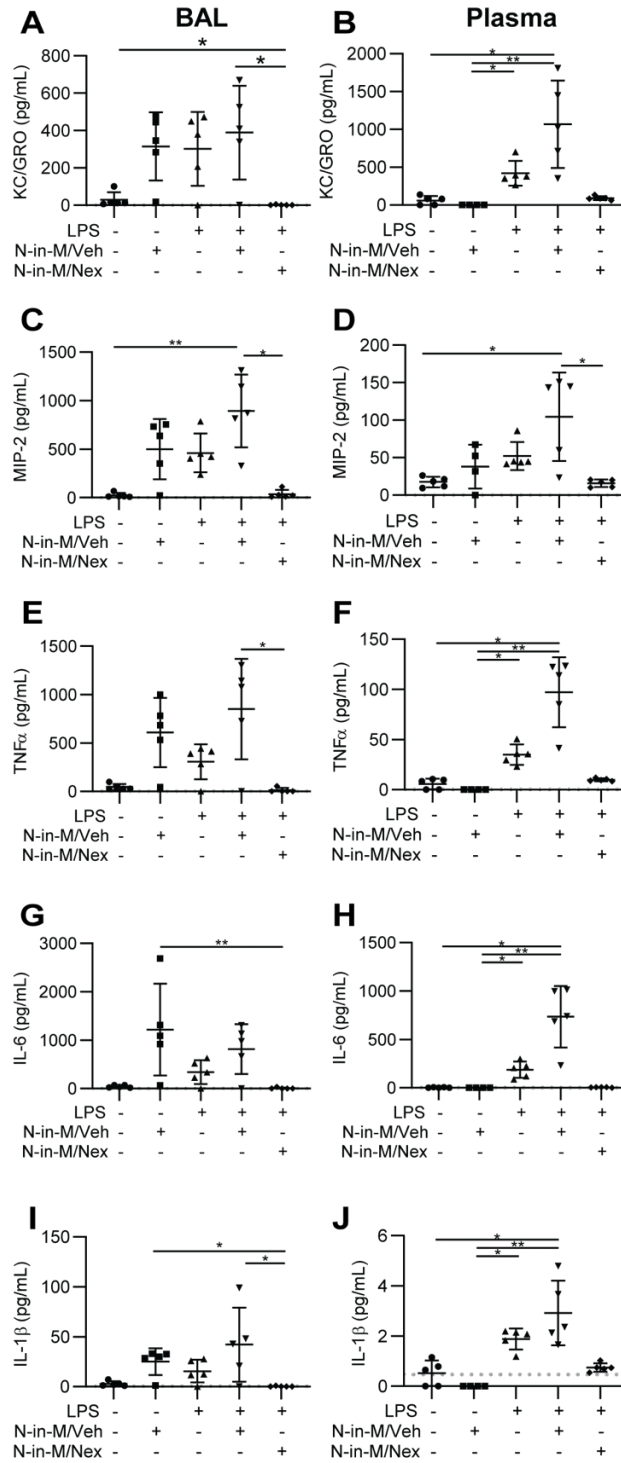

**Figure S3. Delivery of Nexinhib20 reduces critical inflammatory mediators.** Pro-inflammatory cytokines in the BAL and plasma were measured using a multiplex chemiluminescent multiplex ELISA platform. Mice treated with the N-in-M loaded with Nexinhib-20 showed decrease of pro-inflammatory cytokines in both compartments (**A-J**). \* $p < 0.05$ , \*\*  $p < 0.01$ , \*\*\*  $p < 0.001$ , \*\*\*\*  $p < 0.0001$  between groups indicated. Shown are means  $\pm$  IQR; N=4-5.





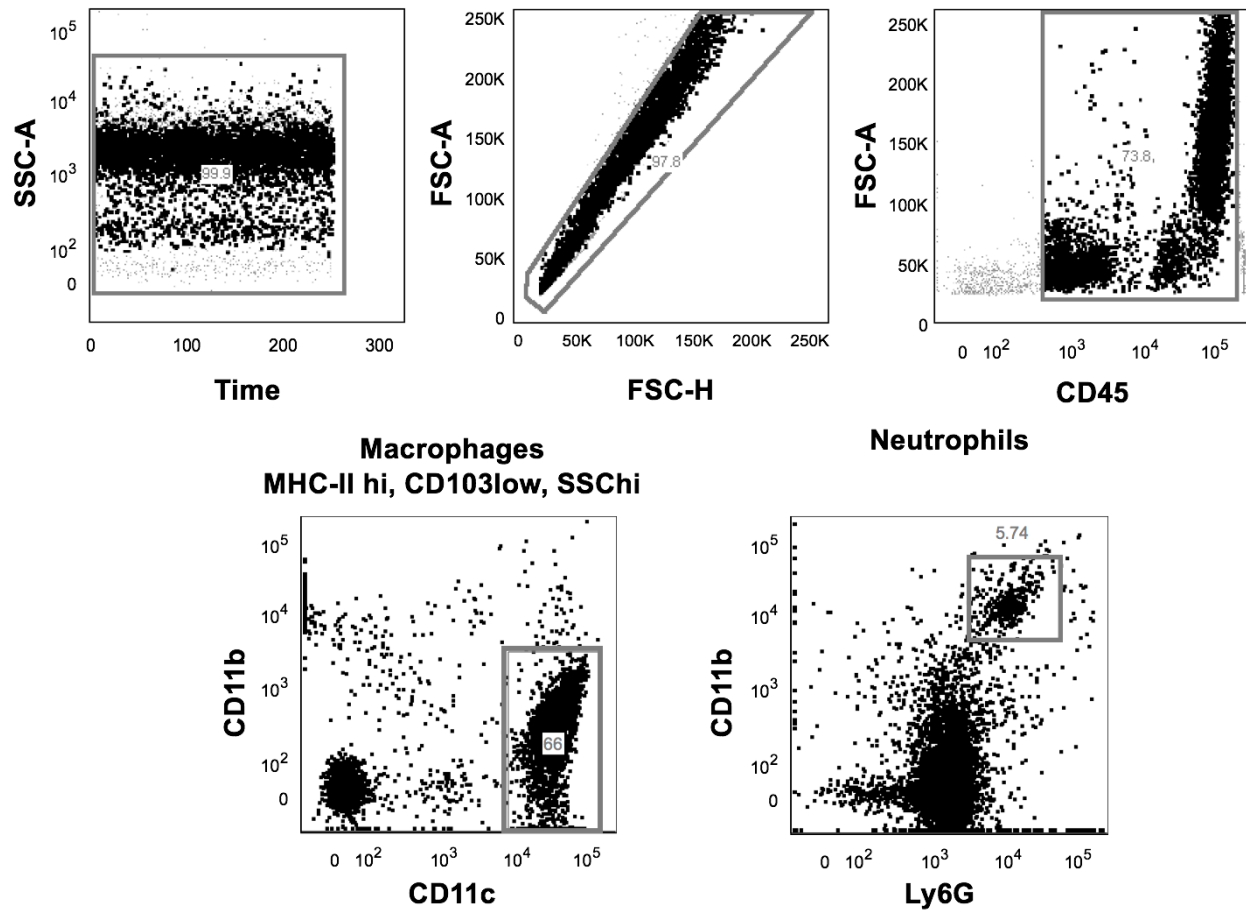

**Figure S5. Flow cytometry gating scheme.** After singlet gating, PMNs were gated as CD45+Ly6G+CD11b+ and macrophages as CD45+F4/80+MHCII+Ly6G-.
